# Supplementary material for: Construction of 3D lithium metal anode using bi-functional composite separator: a new approach for lithium battery
Source: Royal Society of Chemistry journal article supplement (doi:10.1039/d3ra06129a), 2023-01-01
Supplement: d3ra06129a1.pdf [file d3ra06129a1.pdf]

## Supplementary Information

### Construction of 3D Lithium Metal Anode Using Bi-functional Composite

#### Separator: A New Approach for Lithium Battery

*Fengquan Liu<sup>1</sup>, Tianqi Xiang<sup>2</sup>, Jinxin Xue<sup>2</sup>, Sixin Jia<sup>2</sup>, Jun Yan<sup>2</sup>, Hong Huo<sup>2</sup>, Jianjun Zhou<sup>2\*</sup>, Lin Li<sup>1,2\*</sup>*

<sup>1</sup> College of Textiles & Clothing, State Key Laboratory of Bio-Fibers and Eco-Textiles,

Qingdao University, Qingdao, 266071, China

<sup>2</sup> Beijing Key Laboratory of Energy Conversion and Storage Materials, College of Chemistry,

Beijing Normal University, Beijing 100875, China

Correspondence and requests for materials should be addressed to J. J. Zhou.

(pla\_zjj@bnu.edu.cn) and L. Li (lilinll@bnu.edu.cn)

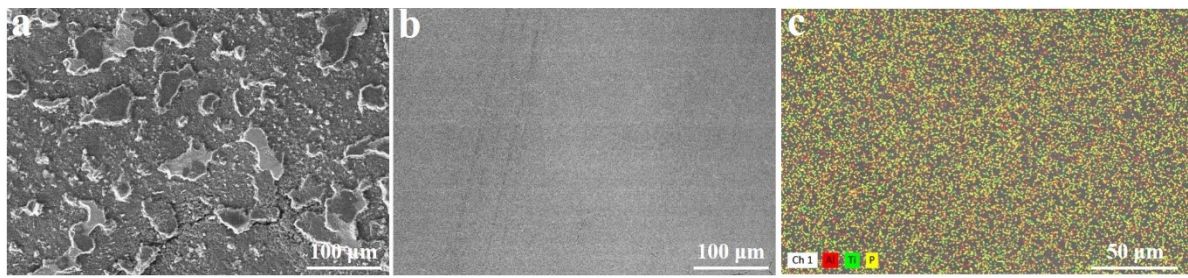

**Fig. S1.** Top view SEM images of covering layer of 3D Li metal anodes obtained by Li||Cu cells with PP/LATP separator using different binders: (a) PVDF and (b) PEO at  $0.5 \text{ mA cm}^{-2}$  for  $4.0 \text{ m Ah cm}^{-2}$  in  $1.0 \text{ mol L}^{-1}$  LiTFSI electrolyte (DOL:DME =1:1, 1 wt%  $\text{LiNO}_3$ ). (c) The element mapping image of covering layer with PEO as binder.

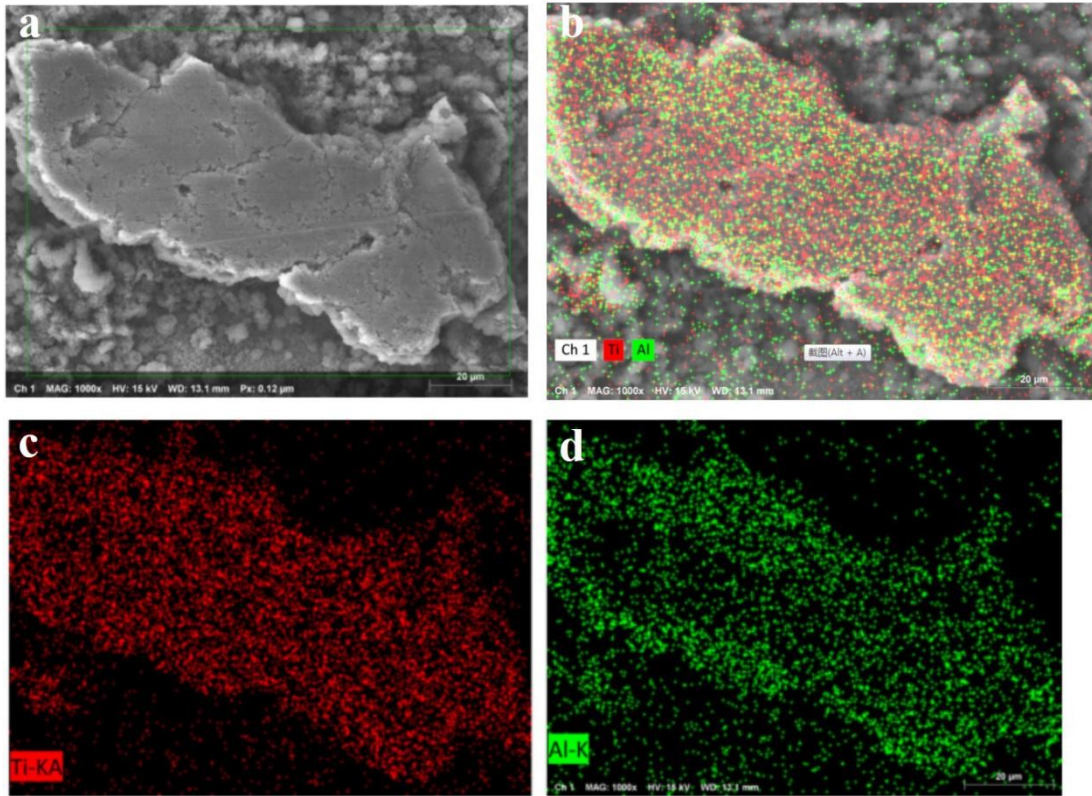

**Fig. S2.** Top view SEM image and its element mapping images of covering layer of 3D Li metal anode obtained by Li||Cu cell with PP/LATP separator using binder of PVDF at 0.5 mA  $\text{cm}^{-2}$  for 4.0 mAh  $\text{cm}^{-2}$  in 1.0 mol  $\text{L}^{-1}$  LiTFSI electrolyte (DOL:DME =1:1, 1 wt%  $\text{LiNO}_3$ ).

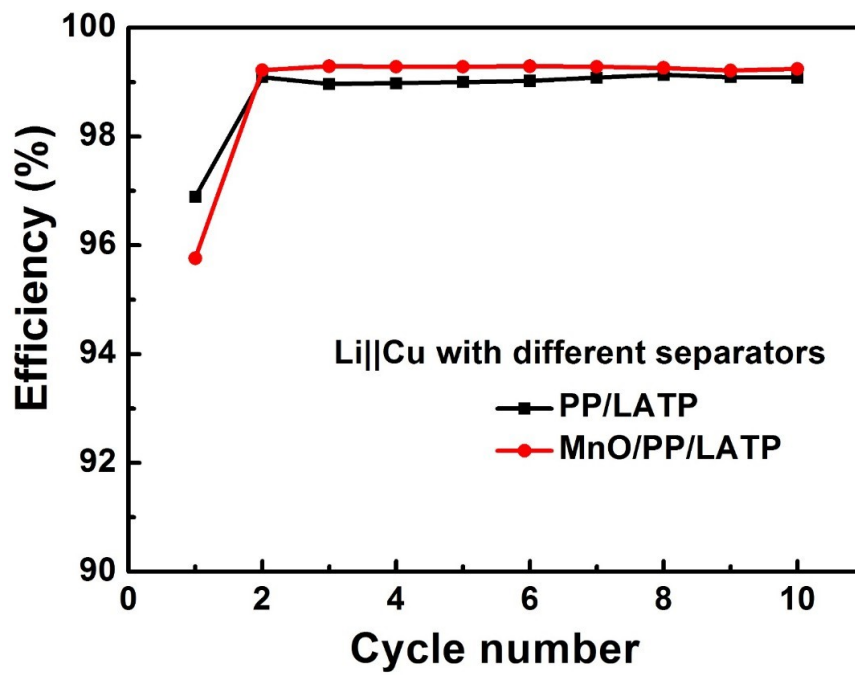

**Fig. S3.** The Coulombic efficiencies of Li||Cu cells with different separators under  $0.5 \text{ mA cm}^{-2}$  for  $4.0 \text{ mAh cm}^{-2}$ , respectively.

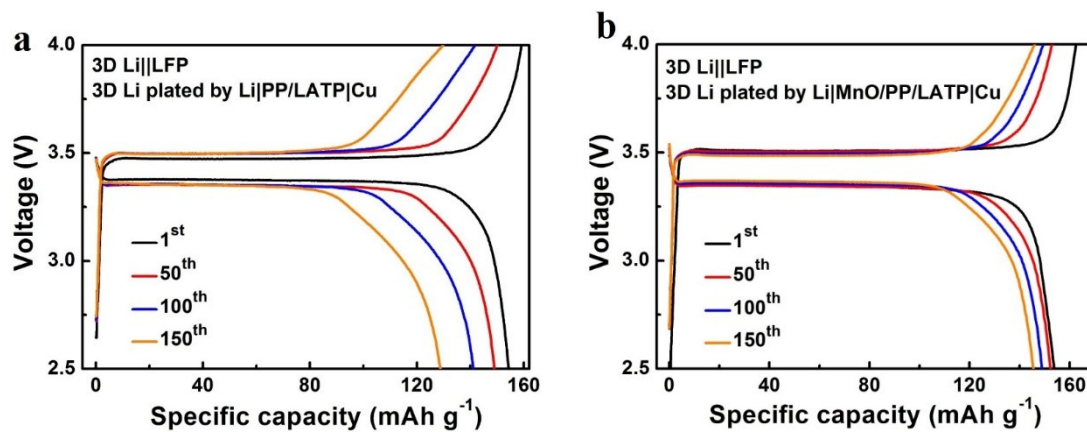

**Fig. S4.** Charging/discharging curves of 3D Li||LFP cells with PP separators in 1.0 mol L<sup>-1</sup> LiTFSI (DOL:DME=1:1, 1 wt% LiNO<sub>3</sub>) at 0.5 C. 3D Li was obtained by Li||Cu cells with different separators in 1.0 mol L<sup>-1</sup> LiTFSI (DOL: DME=1:1, 1 wt% LiNO<sub>3</sub>).

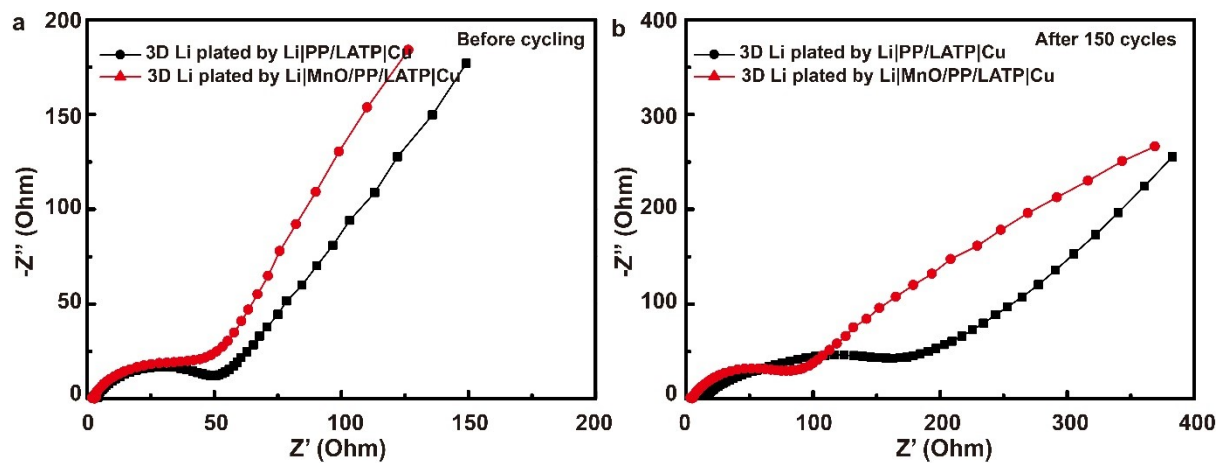

**Fig. S5.** Nyquist plots of the 3D Li||LFP cells with PP separators before and after 150 cycles.

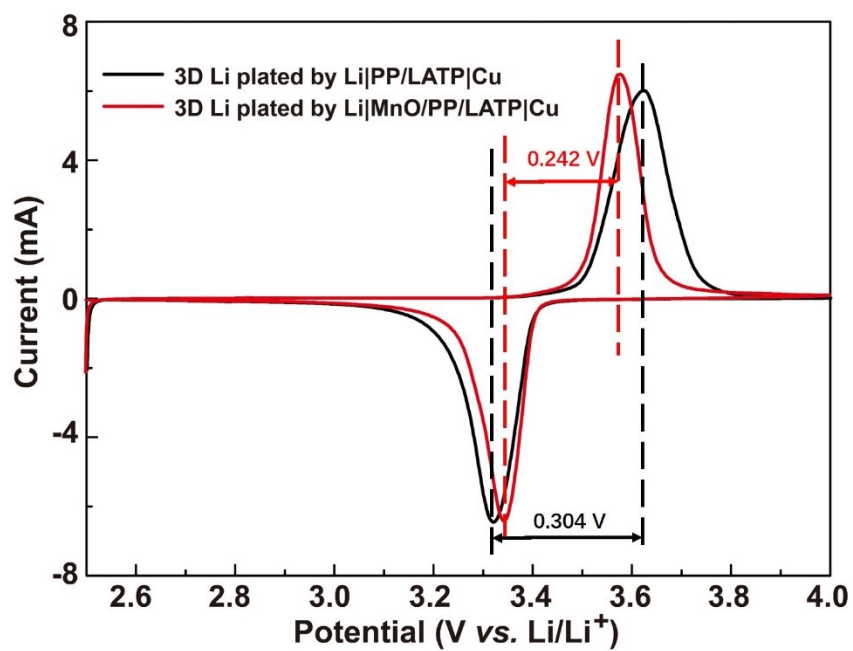

Fig. S6. CV curves of 3D Li||LFP cells at the scan rate of 0.1 mV s<sup>-1</sup>.

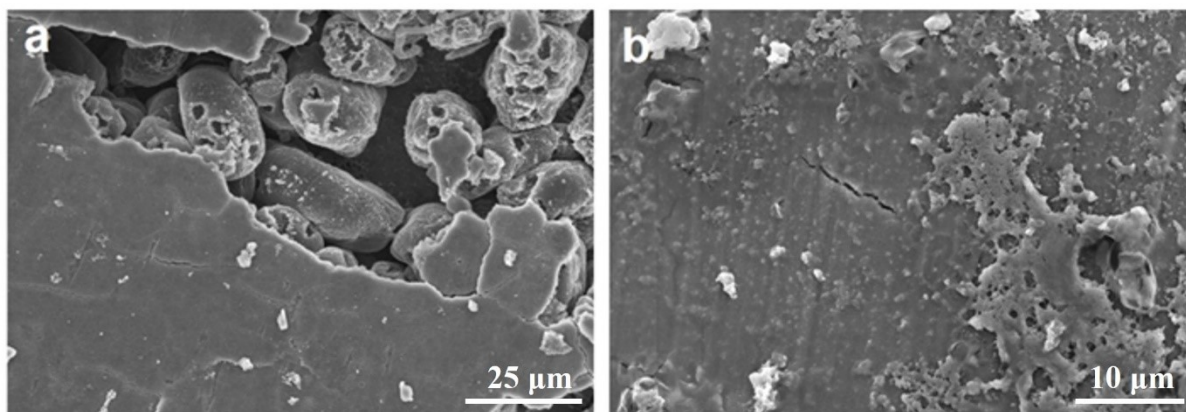

**Fig. S7.** SEM images of 3D Li anode from 3D Li||NCM622 cells after 80 cycles.



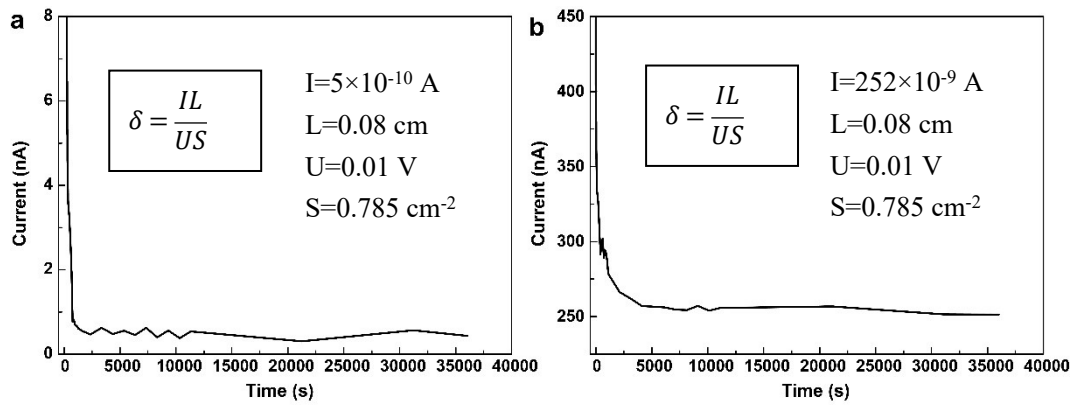

**Fig. S8.** Curves of direct current with time of pure LAMP and reduced LAMP.

**Table S1.** Properties of the separators

|             | Thickness,<br>$\mu\text{m}$ | Gurly<br>Value,<br>s/100cc | Porosity<br>,<br>% | Puncture<br>Strength,<br>gf | Tensile<br>strength, MPa |      | Shrinkage, %<br>(120 °C, 1 h) |      |
|-------------|-----------------------------|----------------------------|--------------------|-----------------------------|--------------------------|------|-------------------------------|------|
|             |                             |                            |                    |                             | MD                       | TD   | MD                            | TD   |
|             |                             |                            |                    |                             | PP                       | 19.6 | 257                           | 40.2 |
| MnO/PP/LATP | 27.3                        | 315                        | 39.6               | 332                         | 136.4                    | 14.2 | 1.7                           | 0    |

**Table S2.** The summary of performance of Li||LFP cells with lithium-free or ultra-thin lithium-metal anodes in the literatures.

| Method                           | Material                                 | Full cells cycling performance     |                          |                                                  |                |                             | Ref. |
|----------------------------------|------------------------------------------|------------------------------------|--------------------------|--------------------------------------------------|----------------|-----------------------------|------|
|                                  |                                          | Cathode and areal capacity         | Areal capacity of anode  | Charge/discharge rate                            | Cycling number | Capacity retention rate (%) |      |
| Modifying separator              | MnCO <sub>3</sub>                        | LFP<br>3.8 mg cm <sup>-2</sup>     | 2.0 mAh cm <sup>-2</sup> | 0.5C/0.5C                                        | 110            | 95.3                        | [9]  |
| Highly concentrated electrolytes | 4.0 M LiFSI-DME                          | LFP<br>1.6 mAh cm <sup>-2</sup>    | Anode-free               | 0.2 mA cm <sup>-2</sup> /2.0 mA cm <sup>-2</sup> | 100            | 54                          | [10] |
| Coating on Cu current collector  | PDMS                                     | LFP                                | 1.0 mAh cm <sup>-2</sup> | 0.5C/0.5C                                        | 100            | ~ 93                        | [17] |
| Modifying separator              | MnO                                      | LFP<br>6.0 mg cm <sup>-2</sup>     | 2.0 mAh cm <sup>-2</sup> | 0.5C/0.5C                                        | 120            | 98.4                        | [23] |
| Modifying Cu current collector   | Lithium-copper-lithium arrays            | LiCoO <sub>2</sub>                 | Li: 70 μm<br>Cu: 25 μm   | 0.2C/0.2C                                        | 200            | 92                          | [28] |
| Modifying Cu current collector   | CuO nanosheets                           | LFP<br>1.3 mg cm <sup>-2</sup>     | 1.5 mAh cm <sup>-2</sup> | 0.5C/0.5C                                        | 300            | 81.3                        | [29] |
| Dual-salt carbonate electrolyte  | 2.0 M LiDFOB and 1.4 M LiBF <sub>4</sub> | NMC532<br>3.1 mAh cm <sup>-2</sup> | Anode-free               | 0.2C/0.5C                                        | 200            | 80                          | [30] |

---

|                                             |                            |                                  |                          |                                                                                       |     |      |           |
|---------------------------------------------|----------------------------|----------------------------------|--------------------------|---------------------------------------------------------------------------------------|-----|------|-----------|
| Epitaxial induced plating current-collector | Liquid metal coating layer | NCM811<br>25 mg cm <sup>-2</sup> | Anode-free               | 1 <sup>st</sup> : 0.05C/<br>0.2C;<br>2 <sup>th</sup> -50 <sup>th</sup> :<br>0.1C/0.2C | 50  | 84   | [31]      |
| Modifying separator                         | MnO and LATP               | LFP<br>9.6 mg cm <sup>-2</sup>   | 4.0 mAh cm <sup>-2</sup> | 0.5C/0.5C                                                                             | 150 | 94.5 | This work |

---
